# Supplementary material
Source: PubMed Central journal article supplement (PMC2401330)
Supplement: M800020-MCP200_1.pdf [file M800020-MCP200_1.pdf]

Table I

MS:MS analysis of the signal at 658.3597 identifying a conjugate comprising residues 21-23 and 1037-1042 of the PhK regulatory  $\beta$  subunit.

Lower and upper case letters denote ions arising from amide fragmentation of the peptide backbone and the GMBS cross-link, respectively. C', C and B refer respectively to fragments of the intervening cross-link that result from c and b type cleavages after the maleimido nitrogen, butyryloxy carbonyl and  $\epsilon$ -amine nitrogen of K22. Intact cross-links (:) or covalent attachment of a fragment of the cross-link (·) are so noted under the ion heading. The immonium ion of K22 is denoted by  $a_{3-3}$ .

| m:z<br>Experimental | Relative<br>intensity | ion <sup>a,b,c</sup>             | sequence     | m:z<br>Calculated | error ppm |
|---------------------|-----------------------|----------------------------------|--------------|-------------------|-----------|
| 217.0755            | 0.80                  | $b_{2-3}^+$ or $a_2^+$           | ES or DE     | 217.0819          | 30.0      |
| 245.0763            | 1.79                  | $b_2^+$                          | DE           | 245.0768          | 5.30      |
| 262.0418            | 3.89                  | $c_2^+$                          | DE           | 262.1034          | 234       |
| 284.0638            | 0.77                  | $(b_4^0 \cdot C')^{2+}$          | DESR         | 284.1118          | 169       |
| 341.1742            | 0.94                  | $(c_2 : b_{4-5})^{2+}$           | TK : RL      | 341.2059          | 93.0      |
| 409.3294            | 1.74                  | $(a_2^* : b_{2-5}^0)^{2+}$       | TK : ESRL    | 409.2124          | 286       |
| 425.4752            | 1.45                  | $y_2^* : y_3^{*2+}$              | KR : RLK     | 425.4752          | 0.127     |
| 430.364             | 19.44                 | $(y_6^* \cdot B-2H_2O)^{2+}$     | DESRLK       | 430.2010          | 378       |
| 470.2997            | 0.71                  | $(a_2 : a_5)^{2+}$               | TK : DESRL   | 470.2483          | 109       |
| 477.6212            | 0.99                  | $(y_2 : b_{2-5})^{2+}$           | KR : ESRL    | 477.2620          | 753       |
| 493.3414            | 1.01                  | $(a_2 : b_5 + H_2O)^{2+}$        | TK : DESRL   | 493.2530          | 179       |
| 512.3757            | 2.32                  | $(y_2 : a_5^*)^{2+}$             | KR : DESRL   | 512.2645          | 217       |
| 518.7748            | 3.02                  | $(y_3 : b_{2-5}^0)^{2+}$         | TKR : ESRL   | 518.7783          | 10.0      |
| 528.0253            | 100.00                | $(y_3^0 : c_4)^{2+}$             | TKR : DESR   | 528.2650          | 453       |
| 536.4355            | 1.25                  | $(y_3 : y_4)^{2+}$               | TKR : SRLK   | 536.3171          | 221       |
| 539.1461            | 2.17                  | $(x_2 : b_5^0 - 17)^{2+}$        | KR : DESRL   | 539.2885          | 264       |
| 544.1265            | 2.28                  | $(b_2^0 : y_6^0 - H_2O)^{2+}$    | TK : DESRLK  | 544.3705          | 448       |
| 585.5363            | 4.34                  | $(y_3 : b_5)^{2+}$               | TKR : DESRL  | 585.2991          | 405       |
| 587.6885            | 6.71                  | $(y_3^* : x_5 - 17 - H_2O)^{2+}$ | TKR : ESRLK  | 587.8097          | 206       |
| 590.5178            | 3.52                  | $(y_2^* : y_6^0)^{2+}$           | KR : DESRLK  | 590.3095          | 353       |
| 601.3137            | 2.72                  | $(a_2^* : b_{4-5}^0)^+$          | TK : RL      | 601.356           | 71.0      |
| 615.2781            | 1.61                  | $(y_5^*)^+$                      | ESRLK        | 615.3466          | 111       |
| 623.2832            | 2.02                  | $(a_{2-5}^* \cdot C)^+$          | ESRL         | 623.3154          | 51.6      |
| 635.7613            | 3.23                  | $(a_{3-3} : a_{2-4})^+$          | K : ESR      | 635.3142          | 703       |
| 640.4674            | 11.05                 | $(y_3^0 : y_6^0)^{2+}$           | TKR : DESRLK | 640.3233          | 197       |
| 641.4561            | 11.18                 | $(y_3^* : y_6^*)^{2+}$           | TKR : DESRLK | 641.3253          | 204       |
| 646.4799            | 6.89                  | $(b_2^0 : b_{4-5})^+$            | TK : RL      | 646.3667          | 175       |
| 649.6328            | 10.07                 | $(y_3^* : y_6)^{2+}$             | TKR : DESRLK | 649.8385          | 316       |
| 670.5092            | 1.36                  | $(b_4 \cdot C)^+$                | DESR         | 670.2791          | 343       |
| 717.6456            | 0.78                  | $(b_2^* : b_{3-5}^*)^+$          | TK : SRL     | 717.3567          | 400       |
| 761.4265            | 1.49                  | $(y_3^* : b_{3-4}^* - 17)^+$     | TKR : SR     | 761.3570          | 91.0      |
| 777.2460            | 0.42                  | $(y_3^* : b_{3-4}^0)^+$          | TKR : SR     | 777.3997          | 198       |
| 789.6215            | 0.57                  | $(y_2^* : b_{3-5}^0)^+$          | KR : SRL     | 789.4415          | 228       |
| 795.6428            | 1.10                  | $(y_2^* : a_{2-4})^+$            | KR : ESR     | 795.4100          | 292       |
| 801.0935            | 1.25                  | $(b_5 \cdot C + H_2O)^+$         | DESRL        | 801.3730          | 350       |
| 874.5126            | 5.95                  | $(a_{3-3} : b_5^0)^+$            | K:DESRL      | 874.4714          | 108       |
| 897.4690            | 0.44                  | $(b_2 : y_4)^+$                  | TK : SRLK    | 897.4690          | 61.0      |
| 909.6128            | 2.59                  | $(y_2 : a_4 - H_2O)^+$           | KR : DESR    | 909.4621          | 166       |
| 940.5364            | 0.82                  | $(c_2 : x_4)^+$                  | TK : SRLK    | 940.5294          | 7.50      |
| 957.6760            | 1.23                  | $(z_2 : b_4 + H_2O)^+$           | KR : DESR    | 957.4145          | 273       |
| 968.6324            | 0.78                  | $(y_3 : z_3)^+$                  | TKR : RLK    | 968.5845          | 50.0      |
| 985.4358            | 2.28                  | $(a_2 : b_5 + H_2O)^+$           | TK : DESRL   | 985.4948          | 60.0      |
| 1039.615            | 0.46                  | $(y_3^* : b_4^*)^+$              | TKR : DESR   | 1039.4886         | 121       |
| 1054.669            | 17.52                 | $(y_3 : y_4^*)^+$                | TKR : SRLK   | 1054.6086         | 58.0      |
| 1151.717            | 0.34                  | $(y_3 : b_5^0)^+$                | TKR : DESRL  | 1151.5887         | 111       |
| 1169.831            | 2.64                  | $(y_3 : b_5)^+$                  | TKR : DESRL  | 1169.5992         | 198       |
| 1180.738            | 1.07                  | $(y_2^* : y_6^*)^+$              | KR : DESRLK  | 1180.6040         | 113       |
| 1187.445            | 0.32                  | $(y_3 : b_5 + H_2O)^+$           | TKR : DESRL  | 1187.6010         | 131       |

<sup>a</sup>The MH<sup>+</sup> ions of TKR and DESRLK are denoted, respectively, as y<sub>3</sub> and y<sub>6</sub>.

<sup>b</sup>For singly charged ions, it should be noted that one of the two peptide ions covalently attached to either functional group of GMBS is a neutral product of the indicated backbone amide cleavage.

<sup>c</sup>Internal fragments and internal fragments-28 Da are respectively labeled b<sub>1-x</sub> and a<sub>1-x</sub>.
